# Supplementary material for: Composition of Metallic Elements and Size Distribution of Fine and Ultrafine Particles in a Steelmaking Factory
Source: MDPI journal article supplement (doi:10.3390/ijerph15061192), 2018-06-07

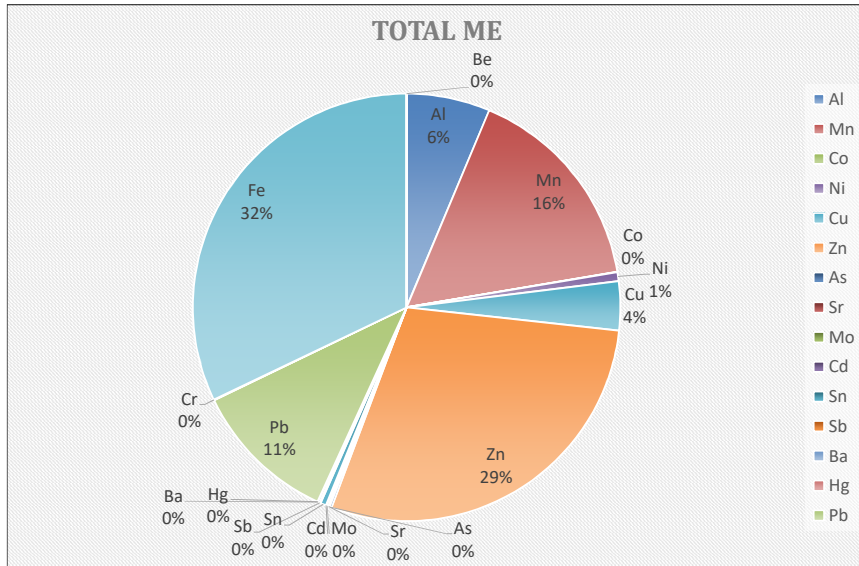

Figure 1. Total of the metallic elements (ME) in percent

Table 1. Concentration of ME (ng/m³) by size fraction

| Di (µm)<br>stage<br>ELPI+ | METALLIC ELEMENTS ng/m³ |         |        |        |  |
|---------------------------|-------------------------|---------|--------|--------|--|
| Most<br>represent         | Fe                      | Zn      | Mn     | Pb     |  |
| 0.121                     | 1345.59                 | 213.24  | 99.63  | 147.06 |  |
| 0.202                     | 1031.25                 | 569.85  | 251.84 | 246.32 |  |
| 0.316                     | 577.21                  | 979.78  | 450.37 | 360.29 |  |
| 0.483                     | 610.29                  | 1323.53 | 626.84 | 472.43 |  |
| 0.761                     | 1226.10                 | 1786.76 | 783.09 | 751.84 |  |
| 1.231                     | 867.65                  | 968.75  | 415.44 | 327.21 |  |
| 1.956                     | 476.10                  | 349.26  | 240.81 | 91.91  |  |
| 3.088                     | 490.81                  | 180.15  | 240.81 | 47.06  |  |
| 5.159                     | 395.22                  | 125.00  | 272.06 | 33.09  |  |
| 8.126                     | 264.71                  | 77.21   | 251.84 | 18.38  |  |

| Di (µm)<br>stage<br>ELPI+ | METALLIC ELEMENTS ng/m³ |        |       |       |  |
|---------------------------|-------------------------|--------|-------|-------|--|
| Less<br>represent         | Al                      | Cu     | Ni    | Sn    |  |
| 0.121                     | 38.24                   | 275.74 | 27.02 | 31.25 |  |
| 0.202                     | 36.03                   | 211.40 | 21.88 | 25.00 |  |
| 0.316                     | 63.60                   | 106.62 | 11.40 | 12.87 |  |
| 0.483                     | 36.76                   | 66.54  | 9.93  | 8.27  |  |
| 0.761                     | 80.88                   | 66.18  | 18.38 | 10.11 |  |
| 1.231                     | 213.24                  | 41.18  | 14.71 | 5.15  |  |
| 1.956                     | 135.29                  | 22.06  | 10.66 | 2.76  |  |
| 3.088                     | 303.31                  | 21.32  | 24.26 | 2.10  |  |
| 5.159                     | 257.35                  | 17.28  | 10.11 | 2.21  |  |
| 8.126                     | 270.22                  | 12.13  | 8.64  | 1.36  |  |

| Di (µm)<br>stage<br>ELPI+ | METALLIC ELEMENTS ng/m³ |       |      |      |      |      |      |      |  |
|---------------------------|-------------------------|-------|------|------|------|------|------|------|--|
| Trace ME                  | As                      | Mo    | Ba   | Sb   | Sr   | Cr   | Cd   | Co   |  |
| 0.121                     | 13.79                   | 10.85 | 1.65 | 5.33 | 0.51 | 1.32 | 0.33 | 0.59 |  |
| 0.202                     | 9.74                    | 7.90  | 0.02 | 4.04 | 0.22 | 1.18 | 0.22 | 0.59 |  |
| 0.316                     | 4.23                    | 3.86  | 0.63 | 2.21 | 0.48 | 0.02 | 0.59 | 0.33 |  |
| 0.483                     | 2.94                    | 2.57  | 0.85 | 2.21 | 0.59 | 1.03 | 0.70 | 0.18 |  |
| 0.761                     | 2.57                    | 3.13  | 2.24 | 3.68 | 1.36 | 3.13 | 1.21 | 0.55 |  |
| 1.231                     | 1.65                    | 2.02  | 3.13 | 1.80 | 1.40 | 1.73 | 0.44 | 0.40 |  |
| 1.956                     | 1.18                    | 1.54  | 4.23 | 0.77 | 2.57 | 0.02 | 0.29 | 0.26 |  |
| 3.088                     | 1.07                    | 2.02  | 6.99 | 0.66 | 4.23 | 2.21 | 0.26 | 0.33 |  |
| 5.159                     | 0.77                    | 1.54  | 7.54 | 0.51 | 5.15 | 0.26 | 0.18 | 0.33 |  |
| 8.126                     | 0.88                    | 0.96  | 5.88 | 0.26 | 4.60 | 0.02 | 0.02 | 0.37 |  |

Table 2. Concentration of ME (ng) by size fraction

| Di (µm) stage<br>ELPI+ | METALLIC ELEMENTS ng |      |      |      |      |     |      |     |      |      |      |      |      |      |      |      |      |      |
|------------------------|----------------------|------|------|------|------|-----|------|-----|------|------|------|------|------|------|------|------|------|------|
|                        | Al                   | As   | Ba   | Be   | Cd   | Co  | Cr   | Cu  | Fe   | Hg   | Mn   | Mo   | Ni   | Pb   | Sb   | Sn   | Sr   | Zn   |
| 0.121                  | 104                  | 37.5 | 4.5  | <0.6 | 0.9  | 1.6 | 3.6  | 750 | 3660 | <0.5 | 271  | 29.5 | 73.5 | 400  | 14.5 | 85   | 1.4  | 580  |
| 0.202                  | 98                   | 26.5 | <0.1 | <0.6 | 0.6  | 1.6 | 3.2  | 575 | 2805 | <0.5 | 685  | 21.5 | 59.5 | 670  | 11   | 68   | 0.6  | 1550 |
| 0.316                  | 173                  | 11.5 | 1.7  | <0.6 | 1.6  | 0.9 | <0.1 | 290 | 1570 | <0.5 | 1225 | 10.5 | 31   | 980  | 6    | 35   | 1.3  | 2665 |
| 0.483                  | 100                  | 8    | 2.3  | <0.6 | 1.9  | 0.5 | 2.8  | 181 | 1660 | <0.5 | 1705 | 7    | 27   | 1285 | 6    | 22.5 | 1.6  | 3600 |
| 0.761                  | 220                  | 7    | 6.1  | <0.6 | 3.3  | 1.5 | 8.5  | 180 | 3335 | <0.5 | 2130 | 8.5  | 50   | 2045 | 10   | 27.5 | 3.7  | 4860 |
| 1.231                  | 580                  | 4.5  | 8.5  | <0.6 | 1.2  | 1.1 | 4.7  | 112 | 2360 | <0.5 | 1130 | 5.5  | 40   | 890  | 4.9  | 14   | 3.8  | 2635 |
| 1.956                  | 368                  | 3.2  | 11.5 | <0.6 | 0.8  | 0.7 | <0.1 | 60  | 1295 | <0.5 | 655  | 4.2  | 29   | 250  | 2.1  | 7.5  | 7    | 950  |
| 3.088                  | 825                  | 2.9  | 19   | <0.6 | 0.7  | 0.9 | 6    | 58  | 1335 | <0.5 | 655  | 5.5  | 66   | 128  | 1.8  | 5.7  | 11.5 | 490  |
| 5.159                  | 700                  | 2.1  | 20.5 | <0.6 | 0.5  | 0.9 | 0.7  | 47  | 1075 | <0.5 | 740  | 4.2  | 27.5 | 90   | 1.4  | 6    | 14   | 340  |
| 8.126                  | 735                  | 2.4  | 16   | <0.6 | <0.1 | 1   | <0.1 | 33  | 720  | <0.5 | 685  | 2.6  | 23.5 | 50   | 0.7  | 3.7  | 12.5 | 210  |

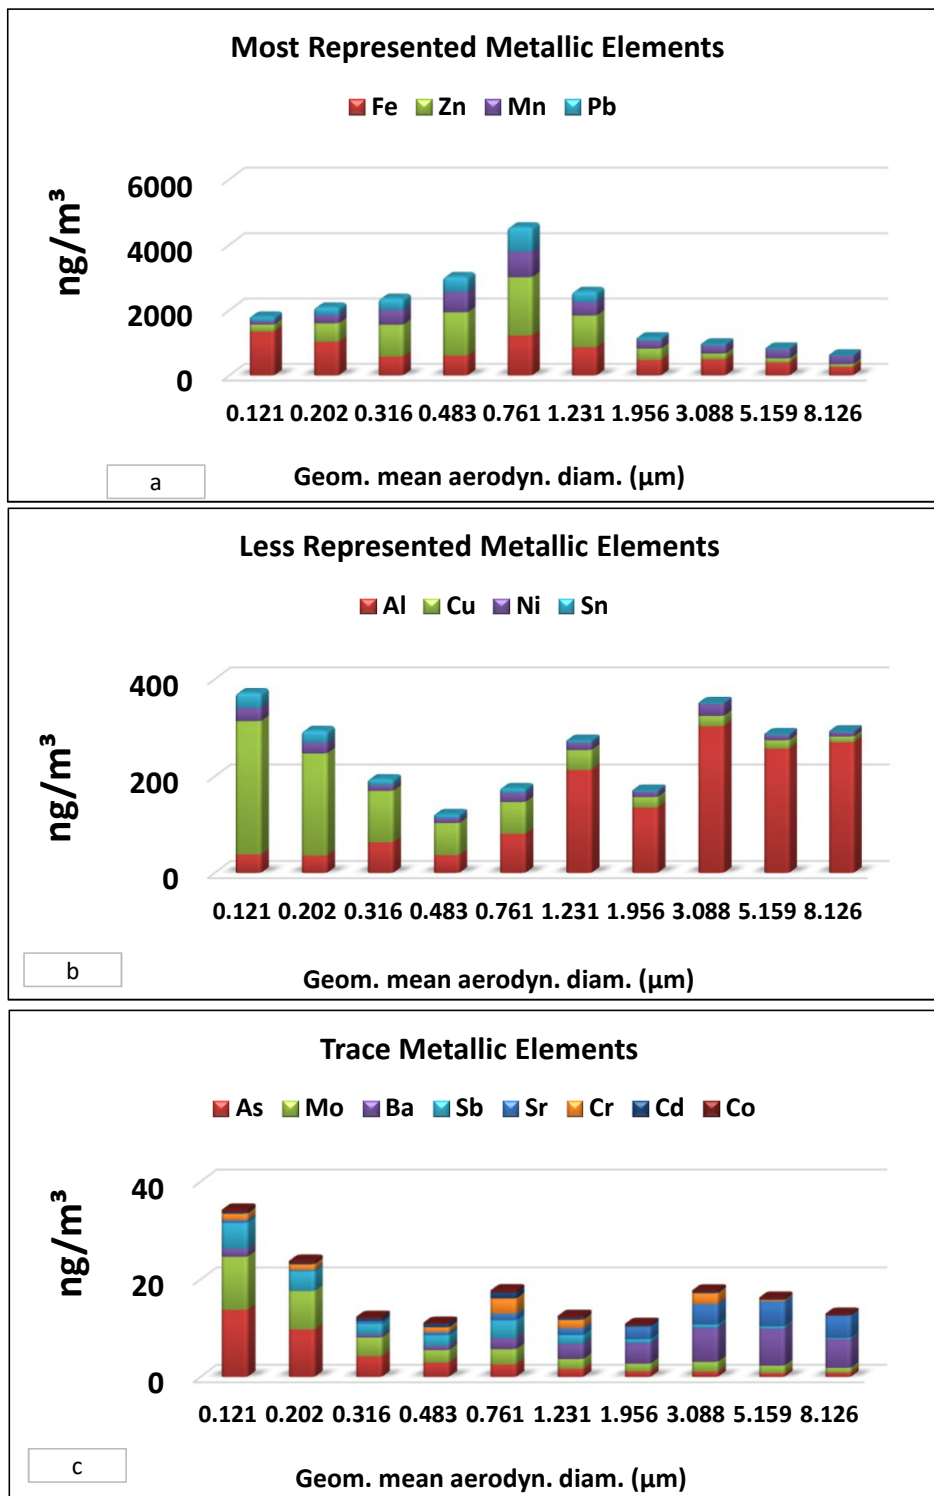

Figure 2. Distribution of most represented ME (a), less represented ME (b) and trace ME (c)

## METALLIC ELEMENTS BY SIZE FRACTION

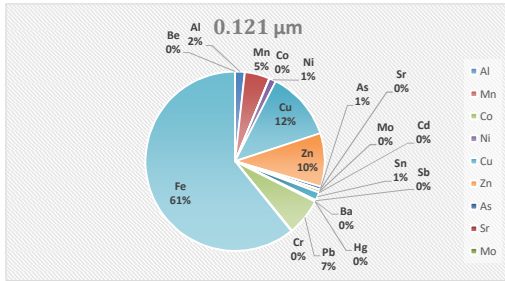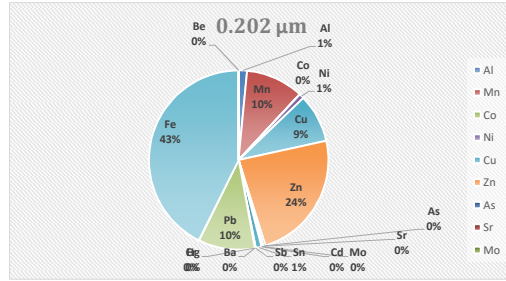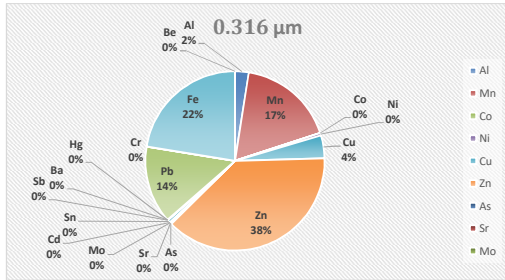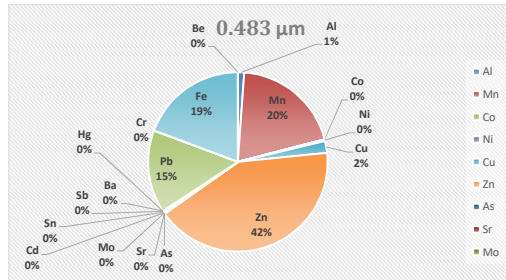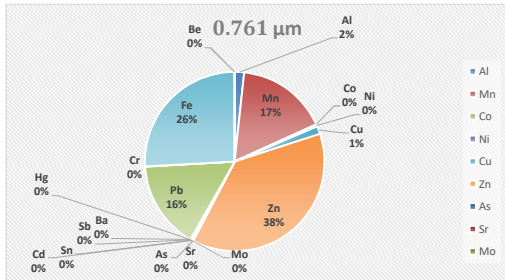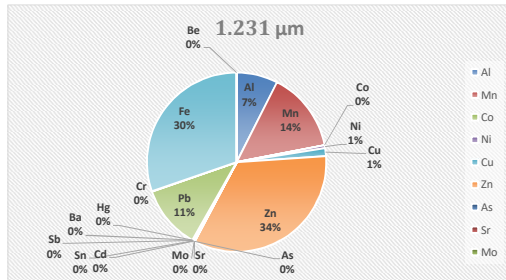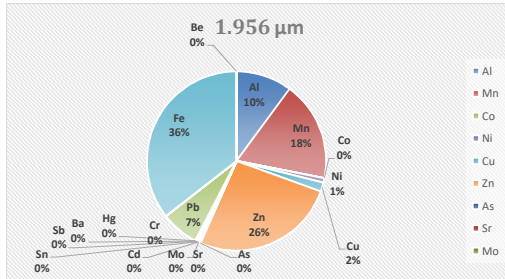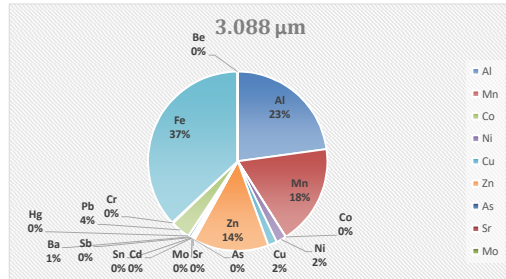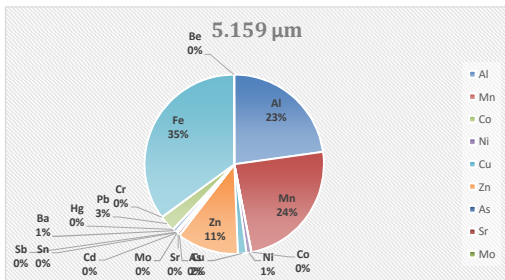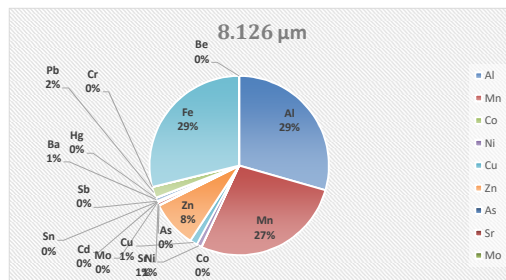

## SINGLE METALLIC ELEMENTS DISTRIBUTION

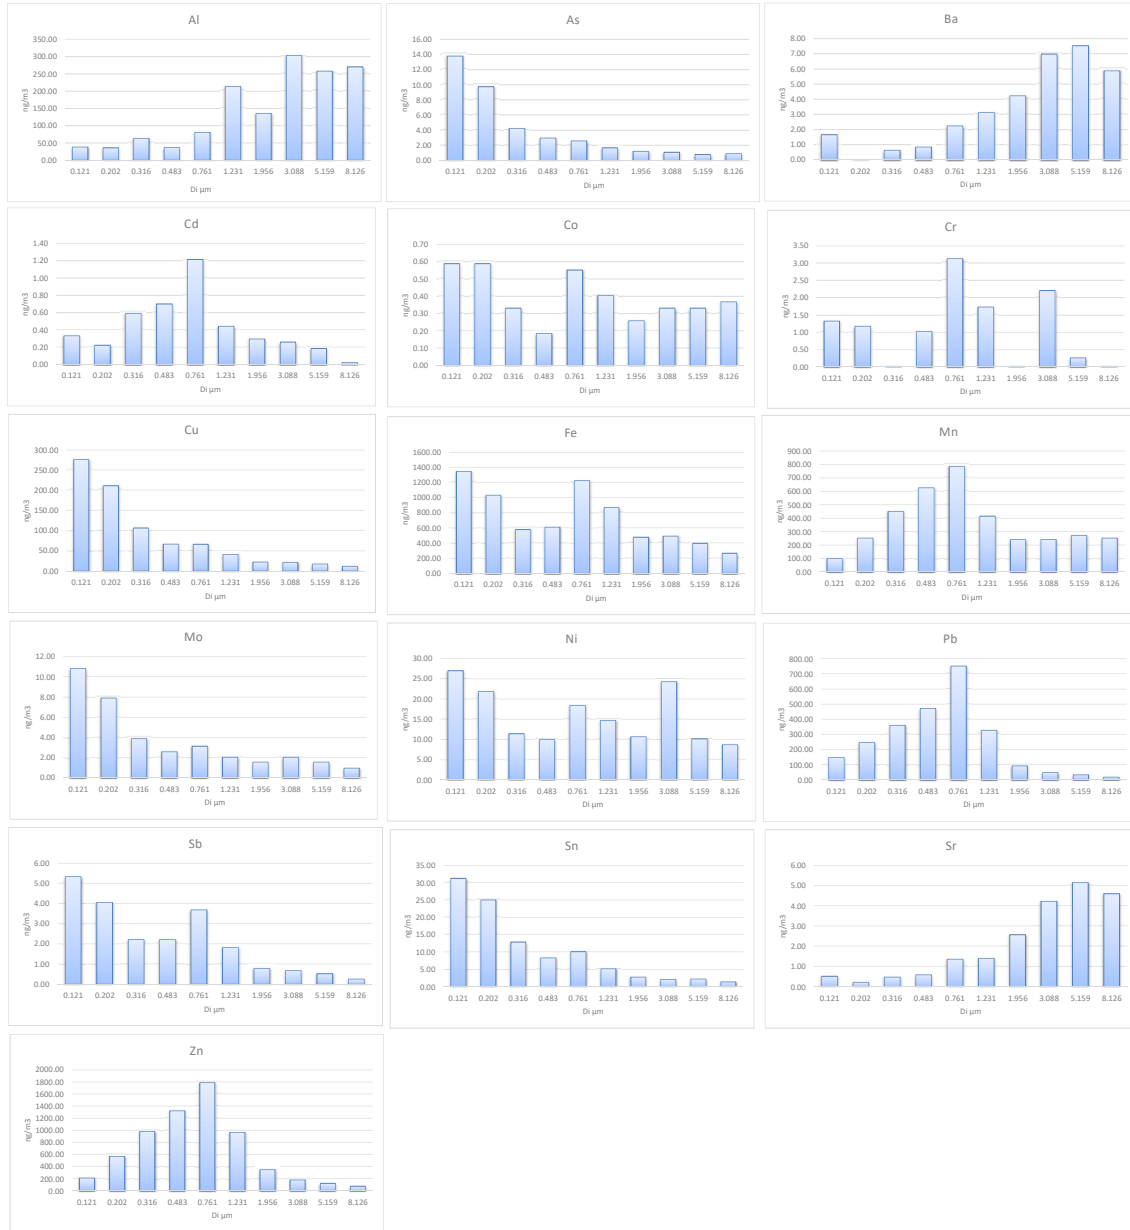

Supplement: s1 [file s1]
